# Supplementary material for: Synthesis and structural characterization of tris(2-seleno-1-mesitylimidazolyl) hydroborato complexes: A new type of strongly electron donating tripodal selenium ligand
Source: Royal Society of Chemistry journal article supplement (doi:10.1039/b608078b), 2006-01-01
Supplement: b608078b.pdf [file b608078b.pdf]

## SUPPORTING INFORMATION

### **Synthesis and Structural Characterization of *Tris*(2-seleno-1-mesitylimidazolyl)hydroborato Complexes: A New Type of Strongly Electron Donating Tripodal Selenium Ligand**

Mao Minoura, Victoria K. Landry, Jonathan G. Melnick, Keliang Pang, Luciano Marchiò

and Gerard Parkin,\*

*Department of Chemistry,*

*Columbia University,*

*New York, New York 10027, USA.*

*Received xxxx xx, 2006.*

---

## EXPERIMENTAL SECTION

### General Considerations

All manipulations were performed using Schlenk techniques under a nitrogen atmosphere unless otherwise specified. Solvents were purified and degassed by standard procedures.  $^1\text{H}$  and  $^{13}\text{C}$  NMR spectra were measured on Bruker 300 DRX, Bruker 400 DRX, and Bruker Avance 500 DMX spectrometers.  $^1\text{H}$  and  $^{13}\text{C}$  Chemical shifts are reported in ppm relative to  $\text{SiMe}_4$  ( $\delta = 0$ ) and were referenced internally with respect to the protio solvent impurity ( $\delta$  7.26 for  $\text{CHCl}_3$ ;  $\delta$  7.16 for  $\text{C}_6\text{D}_5\text{H}$ ,  $\delta$  1.94 for  $\text{CHD}_2\text{CN}$ ). Coupling constants are given in hertz. Infrared spectra were recorded on Nicolet Avatar 370 DTGS spectrometer and are reported in  $\text{cm}^{-1}$ . Mass spectra were obtained on a Micromass Quadrupole-Time-of-Flight mass spectrometer using fast atom bombardment (FAB). 1-mesitylimidazole-2-selone was obtained using a method analogous to that for the methyl derivative (Guziec, L. J.; Guziec, F. S. Jr. *J. Org. Chem.* **1994**, *59*, 4691-4692) and “ $\text{Zn}(\text{SPh})_2$ ” was generated by reaction of  $\text{Me}_2\text{Zn}$  with  $\text{PhSH}$ .

### X-ray structure determinations

X-ray diffraction data were collected on a Bruker P4 diffractometer equipped with a SMART CCD detector; crystal data, data collection and refinement parameters are summarized in Table 2. The structures were solved using direct methods and standard difference map techniques, and were refined by full-matrix least-squares procedures on  $F^2$  with SHELXTL (Version 5.10; Sheldrick, G. M. SHELXTL, An Integrated System for Solving, Refining and Displaying Crystal Structures from Diffraction Data; University of Göttingen, Göttingen, Federal Republic of Germany, 1981). Hydrogen atoms on carbon are placed in idealized positions and thermal ellipsoid plots are illustrated at the 20% probability level.

### Synthesis of [Tse<sup>Mes</sup>]K

A mixture of 1-mesitylimidazole-2-selone (3.00 g, 11.3 mmol) and KBH<sub>4</sub> (0.24 g, 4.5 mmol) in toluene (35 mL) was refluxed under N<sub>2</sub> for 5 days, thereby depositing a light brown precipitate. The mixture was filtered and the precipitate was washed with pentane (3 × 15 mL) and dried *in vacuo* to give [Tse<sup>Mes</sup>]K as a light brown powder (2.46 g, 77%). <sup>1</sup>H NMR (CD<sub>3</sub>CN): 2.02 [s, 18 H, 6 Me of 3 mesityl], 2.31 [s, 9 H, 3 Me of 3 mesityl], 6.74 [d, <sup>3</sup>J<sub>H-H</sub> = 2, 3 H of 3 imidazole], 6.96 [s, 6 H, 6 CH of 3 mesityl], 7.08 [d, <sup>3</sup>J<sub>H-H</sub> = 2, 3 H of 3 imidazole]. Mass spectrum: *m/z* = 804.7 {M – K}<sup>-</sup>.

### Synthesis of [Tse<sup>Mes</sup>]ZnI

A solution of [Tse<sup>Mes</sup>]K (50 mg, 0.059 mmol) in CH<sub>2</sub>Cl<sub>2</sub> (10 mL) was added over a period of 10 minutes to a suspension of ZnI<sub>2</sub> (19 mg, 0.060 mmol) in CH<sub>2</sub>Cl<sub>2</sub> (10 mL) resulting in the immediate deposition of a white precipitate. The mixture was stirred for 4 hours, allowed to settle for 15 minutes, and filtered. The volatile components were removed from the filtrate *in vacuo* to give [Tse<sup>Mes</sup>]ZnI as a white powder (32 mg, 54%). Crystals of composition [Tse<sup>Mes</sup>]ZnI•3CH<sub>3</sub>CN suitable for X-ray diffraction were obtained from CH<sub>3</sub>CN. <sup>1</sup>H NMR (C<sub>6</sub>D<sub>6</sub>): 1.82 [s, 9 H, 3 Me of 3 mesityl], 2.04 [s, 9 H, 3 Me of 3 mesityl], 2.14 [s, 9 H, 3 Me of 3 mesityl], 6.06 [d, <sup>3</sup>J<sub>H-H</sub> = 2, 3 H of 3 imidazole], 6.53 [s, 3 H, 3 CH of 3 mesityl], 6.74 [s, 3 H, 3 CH of 3 mesityl], 6.75 [d, 3H, <sup>3</sup>J<sub>H-H</sub> = 2, 3 H of 3 imidazole]. IR Data (KBr pellet, cm<sup>-1</sup>): 3132 (w), 2966 (m), 2916 (m), 2856 (w), 2423 (w), 2346 (w), 2291 (w), 1608 (w), 1560 (w), 1485 (s), 1458 (w), 1437 (m), 1418 (s), 1358 (vs), 1317 (m), 1291 (m), 1260 (m), 1189 (vs), 1171 (s), 1130 (w), 1096 (m), 1032 (m), 967 (w), 934 (w), 851 (m), 800 (w), 760 (w), 734 (s), 684 (m), 584 (w), 553 (w), 500 (w). Mass spectrum: *m/z* = 994.9 {M – 1}<sup>+</sup>, 871.0 {M – I}<sup>+</sup>.

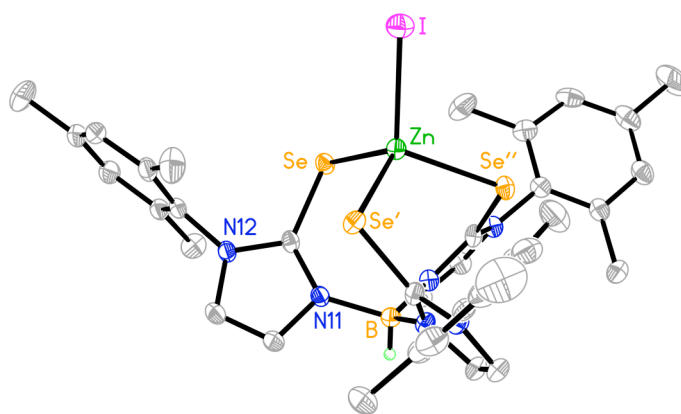

Molecular structure of [Tse<sup>Mes</sup>]ZnI

### Synthesis of [Tse<sup>Mes</sup>]CdI

A solution of [Tse<sup>Mes</sup>]K (50 mg, 0.059 mmol) in CH<sub>2</sub>Cl<sub>2</sub> (10 mL) was added over a period of 10 minutes to a suspension of CdI<sub>2</sub> (22 mg, 0.060 mmol) in CH<sub>2</sub>Cl<sub>2</sub> (10 mL) resulting in the immediate deposition of a white precipitate. The mixture was stirred for 3 hours, allowed to settle for 15 minutes and filtered. The volatile components were removed from the filtrate *in vacuo* to give [Tse<sup>Mes</sup>]CdI as a white powder (31 mg, 50%). Crystals of composition [Tse<sup>Mes</sup>]CdI·3CH<sub>3</sub>CN suitable for X-ray diffraction were obtained from CH<sub>3</sub>CN. Anal. Calcd. for C<sub>36</sub>H<sub>40</sub>BN<sub>6</sub>Se<sub>3</sub>CdI·CH<sub>3</sub>CN: C, 42.1%; H, 4.0%; N, 9.0%. Found: C, 42.1%; H, 3.8%; 9.5%. <sup>1</sup>H NMR (C<sub>6</sub>D<sub>6</sub>): 1.85 [s, 9 H, 3 Me of 3 mesityl], 2.04 [s, 9 H, 3 Me of 3 mesityl], 2.09 [s, 9 H, 3 Me of 3 mesityl], 6.08 [d, 3H, <sup>3</sup>J<sub>H-H</sub> = 2, 3 H of 3 imidazole], 6.53 [s, 3 H, 3 CH of 3 mesityl], 6.68 [s, 3 H, 3 CH of 3 mesityl], 6.77 [d, 3H, <sup>3</sup>J<sub>H-H</sub> = 2, 3 H of 3 imidazole]. IR Data (KBr pellet, cm<sup>-1</sup>): 3165 (m), 3134 (m), 3090 (w), 2946 (w), 2915 (m), 2855 (w), 2733 (w), 2406 (w), 2364 (w), 2344 (w), 2290 (w), 2251 (m), 1607 (w), 1562 (w), 1485 (m), 1435 (m), 1416 (m), 1354 (s), 1316 (m), 1290 (w), 1186 (vs), 1130 (m), 1096 (w), 1033 (m), 965 (w), 933 (w), 888 (w), 850 (s), 761 (w), 732 (m), 682 (m), 682 (w), 582 (w), 555 (w), 495 (w), 464 (w), 425 (w). Mass spectrum: *m/z* = 1042.8 {M - I}<sup>+</sup>, 916.8 {M - I}<sup>+</sup>.

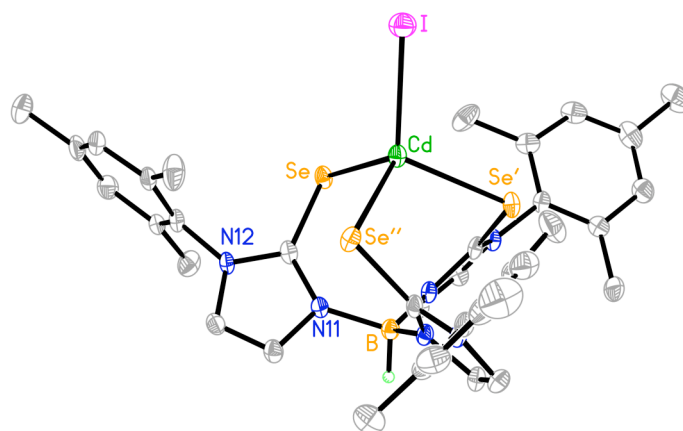

Molecular structure of  $[\text{Tse}^{\text{Mes}}]\text{CdI}$

### Synthesis of $[\text{Tse}^{\text{Mes}}]\text{HgI}$

A solution of  $[\text{Tse}^{\text{Mes}}]\text{K}$  (50 mg, 0.059 mmol) in  $\text{CH}_2\text{Cl}_2$  (10 mL) was added over 10 minutes to a suspension of  $\text{HgI}_2$  (27 mg, 0.059 mmol) in  $\text{CH}_2\text{Cl}_2$  (10 mL) resulting in the immediate deposition of a white precipitate. The mixture was stirred for 3 hours, allowed to settle for 15 minutes, and filtered. The volatile components were removed from the filtrate *in vacuo* to give  $[\text{Tse}^{\text{Mes}}]\text{HgI}$  as a white powder (35 mg, 52%). Crystals of composition  $[\text{Tse}^{\text{Mes}}]\text{HgI} \cdot 3\text{CH}_3\text{OH}$  suitable for X-ray diffraction were obtained from  $\text{CH}_3\text{OH}$ .  $^1\text{H}$  NMR ( $\text{C}_6\text{D}_6$ ): 1.84 [s, 9 H, 3 Me of 3 mesityl], 2.04 [s, 9 H, 3 Me of 3 mesityl], 2.11 [s, 9 H, 3 Me of 3 mesityl], 6.06 [d, 3H,  $^3J_{\text{H-H}} = 2$ , 3 H of 3 imidazole], 6.54 [s, 3 H, 3 CH of 3 mesityl], 6.68 [s, 3 H, 3 CH of 3 mesityl], 6.80 [d, 3H,  $^3J_{\text{H-H}} = 2$ , 3 H of 3 imidazole]. IR Data (KBr pellet,  $\text{cm}^{-1}$ ): 3163 (w), 3126 (w), 3093 (w), 2924 (s), 2855 (m), 2404 (w), 2233 (w), 2066 (m), 1606 (m), 1484 (m), 1460 (s), 1417 (m), 1376 (m), 1355 (m), 1315 (m), 1293 (w), 1188 (m), 1113 (w), 1033 (w), 966 (w), 934 (w), 848 (m), 783 (w), 765 (w), 747 (m), 683 (w), 582 (w). Mass spectrum:  $m/z = 1131.3 \{M\}^+$ ,  $1005.4 \{M - I\}^+$ .

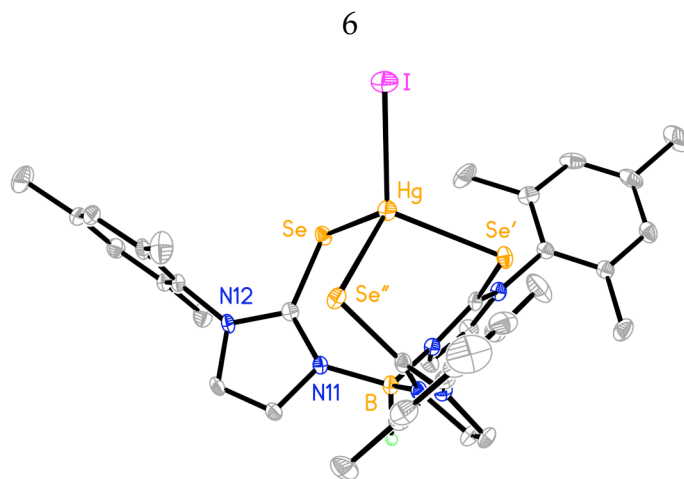

**Molecular structure of [Tse<sup>Mes</sup>]HgI**

### Synthesis of [Tse<sup>Mes</sup>]CoI

A solution of [Tse<sup>Mes</sup>]K (50 mg, 0.059 mmol) in CH<sub>2</sub>Cl<sub>2</sub> (10 mL) was added over a period of 10 minutes to a suspension of CoI<sub>2</sub> (19 mg, 0.061 mmol) in CH<sub>2</sub>Cl<sub>2</sub> (10 mL) resulting in the immediate formation of a white precipitate in a green solution. The mixture was stirred for 4 hours and allowed to settle for 15 minutes. The mixture was filtered and the volatile components were removed *in vacuo* to give [Tse<sup>Mes</sup>]CoI as a green powder (37 mg, 63%). Crystals of composition [Tse<sup>Mes</sup>]CoI·3CH<sub>3</sub>CN suitable for X-ray diffraction were obtained from CH<sub>3</sub>CN. <sup>1</sup>H NMR (C<sub>6</sub>D<sub>6</sub>): -0.92 [br, 9 H, 3 Me of 3 mesityl], 2.15 [s, 9 H, 3 Me of 3 mesityl], 2.25 [s, 18 H, 3 Me of 3 mesityl], 3.29 [br, 3 H of 3 imidazole], 4.05 [br, 3 H of 3 imidazole], 6.27 [s, 3 H, 3 CH of 3 mesityl], 6.38 [s, 3 H, 3 CH of 3 mesityl] (assignments tentative due to the paramagnetic nature of the complex). IR Data (KBr pellet, cm<sup>-1</sup>): 3169 (m), 3142 (m), 3098 (w), 3010 (w), 2972 (w), 2940 (w), 2915 (m), 2855 (w), 2407 (m), 2291 (w), 2254 (m), 1773 (w), 1753 (w), 1608 (m), 1562 (m), 1487 (s), 1437 (m), 1417 (s), 1359 (s), 1316 (m), 1291 (m), 1262 (m), 1187 (vs), 1135 (w), 1094 (w), 1032 (m), 966 (w), 934 (m), 920 (w), 887 (w), 849 (s), 801 (w), 783 (w), 756 (s), 734 (m), 686 (m), 585 (m), 573 (w), 498 (w), 473 (w), 464 (w), 426 (w). Mass spectrum: *m/z* = 990.9{M}<sup>+</sup>, 864.0 {M - I}<sup>+</sup>.

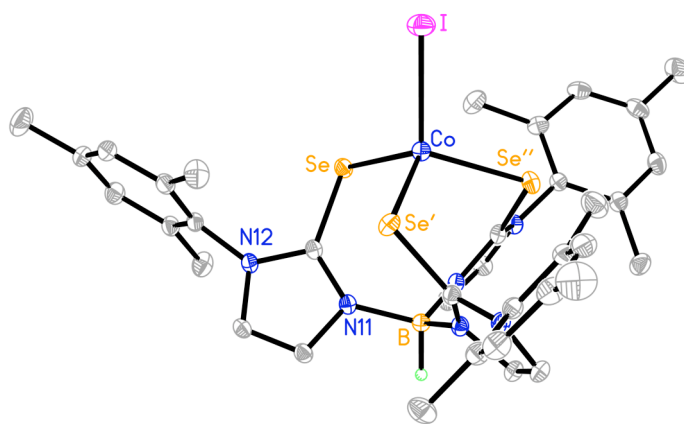

Molecular structure of [Tse<sup>Mes</sup>]CoI

### Synthesis of [Tse<sup>Mes</sup>]ZnSPh

A mixture of [Tse<sup>Mes</sup>]K (20 mg, 0.024 mmol) and "Zn(SPh)<sub>2</sub>" (20 mg, 0.070 mmol) were treated with CD<sub>3</sub>CN (1 mL), thereby demonstrating the rapid formation of [Tse<sup>Mes</sup>]ZnSPh. The mixture was filtered and the solution was allowed to evaporate to deposit colorless crystals that were isolated and dried *in vacuo* (6 mg, 26 % yield). <sup>1</sup>H NMR (CD<sub>3</sub>CN): 1.91 [s, 9 H, 3 Me of 3 mesityl], 1.99 [s, 9 H, 3 Me of 3 mesityl], 2.31 [s, 9 H, 3 Me of 3 mesityl], 6.77-6.90 [m, 3 H, 1 para and 2 meta H's of SPh], 7.00 [s, 3 H, 3 CH of 3 mesityl], 7.01 [s, 3 H, 3 CH of 3 mesityl], 7.06 [d, J<sub>H-H</sub> = 7, 2 ortho H's of SPh], 7.14 [d, 3H, <sup>3</sup>J<sub>H-H</sub> = 2, 3 H of 3 imidazole], 7.35 [d, 3H, <sup>3</sup>J<sub>H-H</sub> = 2, 3 H of 3 imidazole]. Mass spectrum: *m/z* = 870.9 {M – SPh}<sup>+</sup>. Anal. Calcd. for C<sub>42</sub>H<sub>45</sub>BN<sub>6</sub>SSe<sub>3</sub>Zn: C, 51.5%; H, 4.6%; N, 8.6%. Found: C, 51.5%; H, 4.6%; 8.5%.

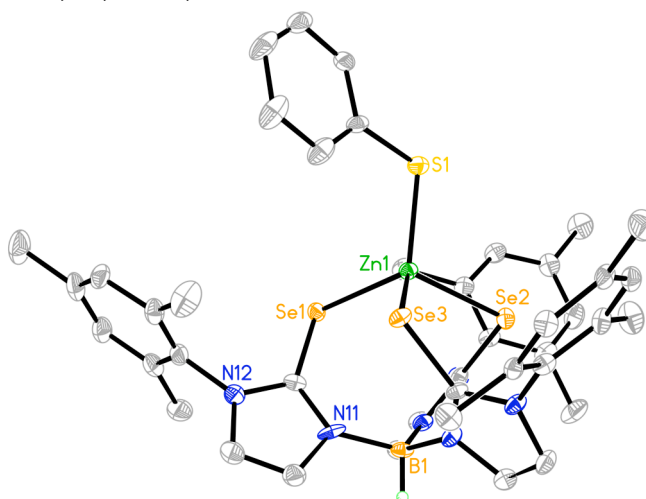

Molecular structure of [Tse<sup>Mes</sup>]ZnSPh

### Synthesis of [Tse<sup>Mes</sup>]<sub>2</sub>Zn

A solution of [Tse<sup>Mes</sup>]<sup>+</sup>K<sup>-</sup> (15 mg, 0.018 mmol) in MeCN (0.7 mL) was treated with ZnI<sub>2</sub> (2 mg, 0.006 mmol). The mixture was shaken vigorously and filtered. The solution was allowed to evaporate slowly to deposit [Tse<sup>Mes</sup>]<sub>2</sub>Zn as colorless crystals after 2 days, which were isolated and dried *in vacuo* (4 mg, 38% yield). <sup>1</sup>H NMR (C<sub>6</sub>D<sub>6</sub> at 70°C): 1.99 [s, 36H, 12 *o*-Me of 6 mesityl], 2.08 [s, 18H, 6 *p*-Me of 6 mesityl], 6.26 [d, J<sub>H-H</sub> = 1.4 Hz, 6H of 6 imidazole), 6.72 [s, 12H of 6 aryl rings], 8.67 [br, 6H of 6 imidazole]. Mass spectrum: *m/z* = 1674.0 {M}<sup>+</sup>. Anal. Calcd. for C<sub>72</sub>H<sub>80</sub>B<sub>2</sub>N<sub>12</sub>Se<sub>6</sub>Zn: C, 51.7%; H, 4.8%; N, 10.0%. Found: C, 51.5%; H, 4.6%; N, 9.8%.

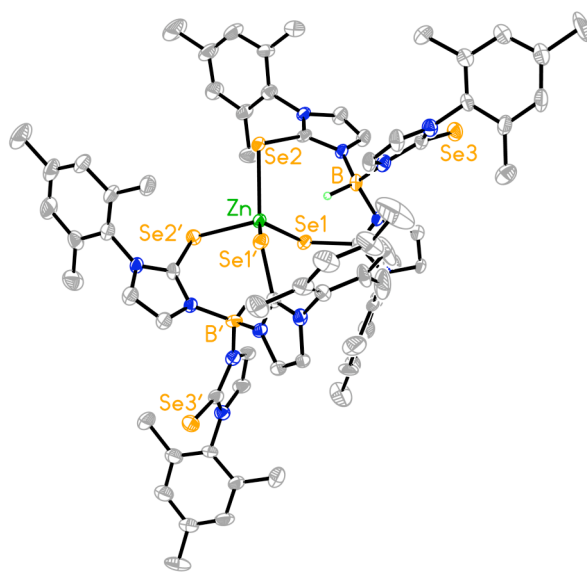

Molecular structure of [Tse<sup>Mes</sup>]<sub>2</sub>Zn



### Synthesis of [Tse<sup>Mes</sup>]Re(CO)<sub>3</sub>

A mixture of [Tse<sup>Mes</sup>]K (30 mg, 0.036 mmol) and Re(CO)<sub>5</sub>Br (15 mg, 0.037 mmol) were treated with benzene (2 mL) and heated at 60 °C for 12 hours. The resulting pale yellow solution was filtered and allowed to form colorless crystals by slow evaporation, which were isolated and dried *in vacuo* (4 mg, 10 % yield). <sup>1</sup>H NMR (CD<sub>3</sub>CN): 1.90 [s, 9 H, 3 Me of 3 mesityl], 2.10 [s, 9 H, 3 Me of 3 mesityl], 2.32 [s, 9 H, 3 Me of 3 mesityl], 7.01 [br s, 6 CH of 3 mesityl], 7.09 [d, 3H, <sup>3</sup>J<sub>H-H</sub> = 2, 3 H of 3 imidazole], 7.32 [d, 3H, <sup>3</sup>J<sub>H-H</sub> = 2, 3 H of 3 imidazole]. IR (KBr pellet, cm<sup>-1</sup>): 3166 (w), 3137 (w), 2917 (w), 2857 (m), 2431 (w), 2370 (w), 1999 (s, ν<sub>CO</sub>), 1886 (s, ν<sub>CO</sub>), 1608 (w), 1561 (w), 1485 (w), 1439 (w), 1357 (m), 1317 (m), 1293 (w), 1190 (s), 1127 (m), 1033 (m), 934 (w), 849 (w), 763 (w), 736 (m), 682 (w), 630 (w), 582 (w), 509 (w). Mass spectrum: *m/z* = 1075.9 {M}<sup>+</sup>.

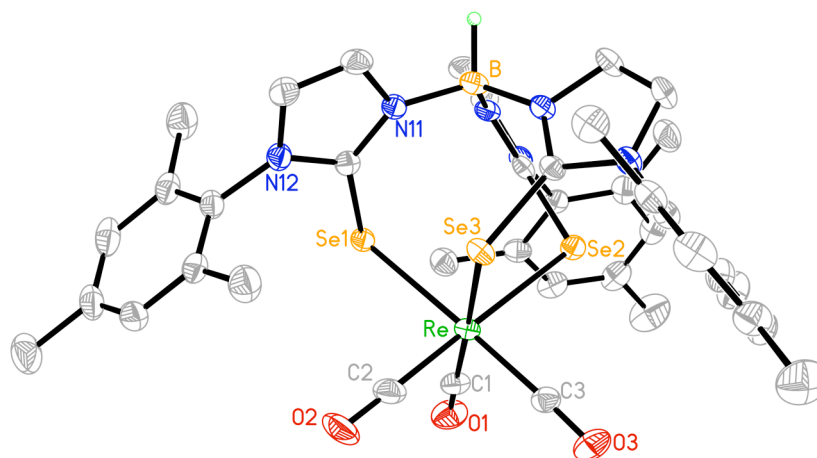

Molecular structure of [Tse<sup>Mes</sup>]Re(CO)<sub>3</sub>

### Synthesis of [Tm<sup>Mes</sup>]Re(CO)<sub>3</sub>

A mixture of [Tm<sup>Mes</sup>]Li (10 mg, 0.015 mmol) and Re(CO)<sub>5</sub>Br (4 mg, 0.010 mmol) were treated with benzene (2 mL) and heated at 60 °C for 12 hours. The resulting solution was filtered and allowed to form colorless crystals by slow evaporation (4 mg, 43 % yield). <sup>1</sup>H NMR (CD<sub>3</sub>CN): 1.95 [s, 9 H, 3 Me of 3 mesityl], 2.08 [s, 9 H, 3 Me of 3 mesityl], 2.32 [s, 9 H, 3 Me of 3 mesityl], 6.99 [s, 3H of aryl ring], 7.01 [s, 3H of aryl ring], 7.02 [d, J<sub>H-H</sub> = 2, 3H of imidazole ring], 7.24 [d, J<sub>H-H</sub> = 2, 3H of imidazole ring]. <sup>1</sup>H NMR (CDCl<sub>3</sub>): 1.98 [s, 9 H, 3 Me of 3 mesityl], 2.14 [s, 9 H, 3 Me of 3 mesityl], 2.31 [s, 9 H, 3 Me

of 3 mesityl], 6.77 [d,  $J_{\text{H-H}} = 2.1$  Hz, 3H of imidazole ring], 6.95 [s, 3H of aryl ring], 6.98 [s, 3H of aryl ring], 7.08 [d,  $J_{\text{H-H}} = 2.1$  Hz, 3H of imidazole ring]. IR (KBr pellet,  $\text{cm}^{-1}$ ): 3136 (w), 2919 (w), 2430 (w), 2365 (w), 2007 (s,  $\nu_{\text{CO}}$ ), 1890 (s,  $\nu_{\text{CO}}$ ), 1608 (w), 1559 (w), 1487 (w), 1439 (w), 1366 (m), 1323 (w), 1292 (w), 1192 (m), 1036 (w), 935 (w), 851 (w), 765 (w), 737 (w), 680 (w), 636 (w), 587 (w), 504 (w). Mass spectrum:  $m/z = 934.0$   $\{\text{M}\}^+$ .

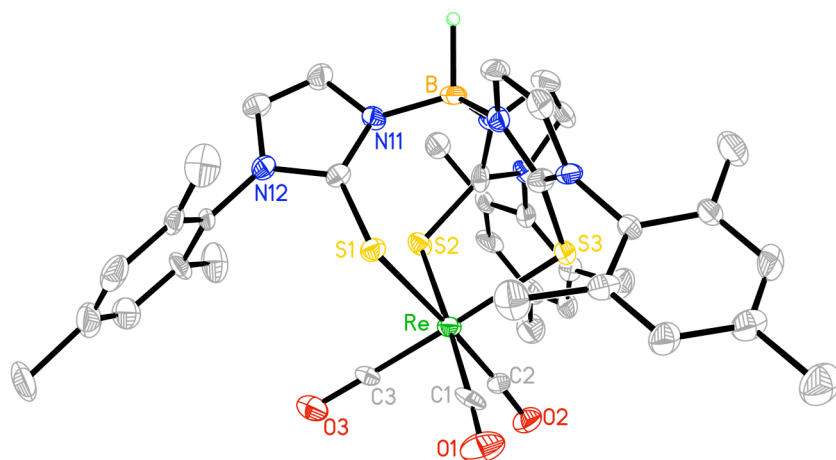

**Molecular structure of  $[\text{Tm}^{\text{Mes}}]\text{Re}(\text{CO})_3$**

### Synthesis of {[Tse<sup>Mes</sup>]<sub>2</sub>In}[InCl<sub>4</sub>]

A mixture of [Tse<sup>Mes</sup>]K (20 mg, 0.024 mmol) and InCl<sub>3</sub> (6 mg, 0.027 mmol) was treated with CDCl<sub>3</sub> (1 mL) and monitored by <sup>1</sup>H NMR spectroscopy, thereby demonstrating the immediate conversion to {[Tse<sup>Mes</sup>]<sub>2</sub>In}[InCl<sub>4</sub>]. The mixture was filtered and the filtrate was allowed to evaporate slowly to deposit colorless crystals of {[Tse<sup>Mes</sup>]<sub>2</sub>In}[InCl<sub>4</sub>] that were isolated and dried *in vacuo* (7 mg, 29 %). <sup>1</sup>H NMR (CDCl<sub>3</sub>): 1.41 [s, 9 H, 3 Me of 3 mesityl], 1.93 [s, 9 H, 3 Me of 3 mesityl], 2.31 [s, 18 H, 6 Me of 6 mesityl], 6.68 [s, 6 H, 6 CH of 6 mesityl], 6.84 [d, 6 H, <sup>3</sup>J<sub>H-H</sub> = 2, 6 H of 6 imidazole], 6.96 [s, 6 H, 6 CH of 6 mesityl], 7.07 [d, 6 H, <sup>3</sup>J<sub>H-H</sub> = 2, 6 H of 6 imidazole]. Anal. Calcd. for C<sub>72</sub>H<sub>80</sub>B<sub>2</sub>N<sub>12</sub>Se<sub>6</sub>In<sub>2</sub>Cl<sub>4</sub>: C, 43.7%; H, 4.1%; N, 8.5%. Found: C, 43.6%; H, 4.1%; 8.4%. Mass spectrum: *m/z* = 1724.2 {M + 1}<sup>+</sup> (M = [Tse<sup>Mes</sup>]<sub>2</sub>In).

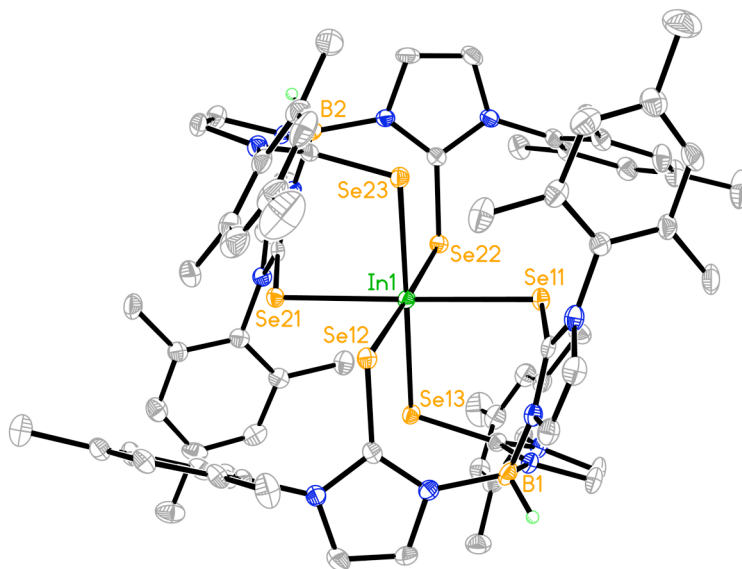

Molecular structure of {[Tse<sup>Mes</sup>]<sub>2</sub>In}<sup>+</sup> (anion not shown)

### Synthesis of $\{[\text{Tse}^{\text{Mes}}]_2\text{Ga}\}[\text{GaCl}_4]$

A mixture of  $[\text{Tse}^{\text{Mes}}]\text{K}$  (20 mg, 0.024 mmol) and  $\text{GaCl}_3$  (4 mg, 0.023 mmol) were combined in a J. Young NMR tube, dissolved in  $\text{CD}_3\text{CN}$  (1 mL), and shaken vigorously. The solution was filtered and allowed to evaporate slowly in a  $\text{N}_2$  atmosphere. After 1 day, large yellow crystals had formed that were isolated and dried *in vacuo* (9 mg, 40 %).  $^1\text{H}$  NMR ( $\text{CDCl}_3$ ): 1.44 [s, 9 H, 3 Me of 3 mesityl], 1.89 [s, 18 H, 6 Me of 6 mesityl], 2.31 [s, 18 H, 6 Me of 6 mesityl], 6.71 [s, 6 H, 6 CH of 6 mesityl], 6.81 [d, 6 H,  $^3J_{\text{H-H}} = 2$ , 6 H of 6 imidazole], 6.95 [s, 6 H, 6 CH of 6 mesityl], 7.08 [d, 6H,  $^3J_{\text{H-H}} = 2$ , 6 H of 6 imidazole]. Anal. Calcd. for  $\text{C}_{72}\text{H}_{80}\text{B}_2\text{N}_{12}\text{Se}_6\text{Ga}_2\text{Cl}_4$ : C, 45.7%; H, 4.3%; N, 8.9%. Found: C, 45.9%; H, 4.0%; 9.1%. Mass spectrum:  $m/z = 1678.1 \{M + 1\}^+$  ( $M = [\text{Tse}^{\text{Mes}}]_2\text{Ga}$ ).

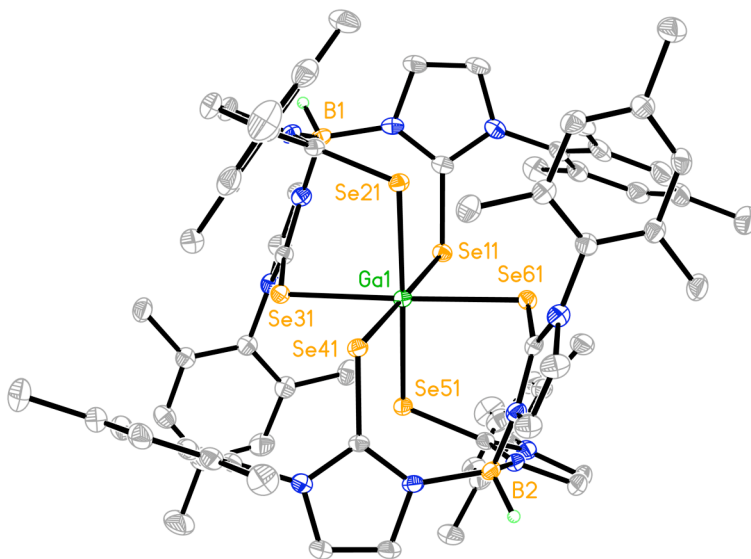

Molecular structure of  $\{[\text{Tse}^{\text{Mes}}]_2\text{Ga}\}^+$  (anion not shown)

### Synthesis of $[\text{Tse}^{\text{Mes}}]_2\text{Cu}_2$

A solution of  $[\text{Tse}^{\text{Mes}}]\text{K}$  (30 mg, 0.036 mmol) in MeCN (0.7 mL) was treated with CuCl (4 mg, 0.041 mmol). The solution was shaken vigorously and then filtered. The solution was allowed to evaporate slowly over a period of 2 days giving small colorless crystals of  $[\text{Tse}^{\text{Mes}}]_2\text{Cu}_2$  that were isolated and dried *in vacuo* (3 mg, 10 % yield).  $^1\text{H}$  NMR ( $\text{CD}_3\text{CN}$ ): 1.85 (s, 36H of mesityl *o*- $\text{CH}_3$ ), 2.36 (s, 18H of mesityl *p*- $\text{CH}_3$ ), 7.02 (s, 12H of mesityl), 7.10 (br doublet, 6H of imidazole), 7.19 (br, 6H of imidazole). Anal. calcd. for  $\text{C}_{36}\text{H}_{40}\text{BCuN}_6\text{Se}_3\text{Cu}$ : C, 49.6%; H, 4.6%; N, 9.7%. Found: C, 49.6%; H, 4.5%; N, 9.4%.

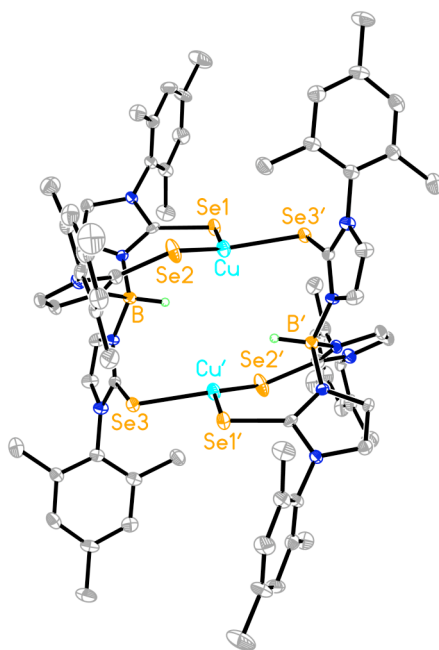

Molecular structure of  $\{[\text{Tse}^{\text{Mes}}]\text{Cu}\}_2$

**Synthesis of  $\{[\text{Tm}^{\text{Mes}}]\text{Cu}\}_2$** 

A solution of  $[\text{Cu}(\text{MeCN})_4][\text{BF}_4]$  (0.019 g, 0.06 mmol) in  $\text{CH}_3\text{CN}$  (2 mL) was added to a solution of  $\text{Tm}^{\text{Mes}}\text{Li}$  (0.04 g, 0.06 mmol) in  $\text{CH}_3\text{CN}$  (2 mL) resulting in the formation of a green precipitate and a colorless solution. The mixture was filtered and colorless crystals were obtained after several days. Anal. calcd. for  $\text{C}_{36}\text{H}_{40}\text{N}_6\text{S}_3\text{BCu}$ : C, 59.5%; H, 5.5%; N, 11.6%. Found: C, 58.6%; H, 6.1%; N, 12.9%.

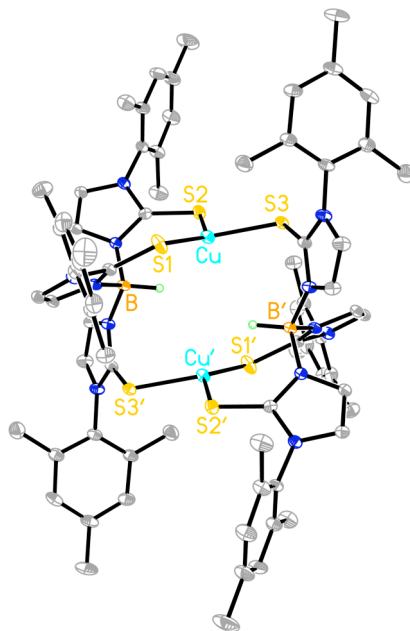

**Molecular structure of  $\{[\text{Tse}^{\text{Mes}}]\text{Cu}\}_2$**

**Table 1.** Crystal, intensity collection and refinement data.

|                                          | [Tse <sup>Mes</sup> ]ZnI·3MeCN                                     | [Tse <sup>Mes</sup> ]CdI·3MeCN                                    |
|------------------------------------------|--------------------------------------------------------------------|-------------------------------------------------------------------|
| lattice                                  | Rhombohedral                                                       | Rhombohedral                                                      |
| formula                                  | C <sub>42</sub> H <sub>49</sub> BI <sub>9</sub> Se <sub>3</sub> Zn | C <sub>42</sub> H <sub>49</sub> BCdI <sub>9</sub> Se <sub>3</sub> |
| formula weight                           | 1119.86                                                            | 1166.89                                                           |
| space group                              | R-3c                                                               | R-3c                                                              |
| <i>a</i> /Å                              | 14.618(1)                                                          | 14.6142(7)                                                        |
| <i>b</i> /Å                              | 14.619(1)                                                          | 14.6142(7)                                                        |
| <i>c</i> /Å                              | 77.980(1)                                                          | 78.868(5)                                                         |
| $\alpha$ /°                              | 90.00                                                              | 90.00                                                             |
| $\beta$ /°                               | 90.00                                                              | 90.00                                                             |
| $\gamma$ /°                              | 120.00                                                             | 120.00                                                            |
| <i>V</i> /Å <sup>3</sup>                 | 14431(3)                                                           | 14588(1)                                                          |
| <i>Z</i>                                 | 12                                                                 | 12                                                                |
| temperature (K)                          | 243                                                                | 243                                                               |
| radiation ( $\lambda$ , Å)               | 0.71073                                                            | 0.71073                                                           |
| $\rho$ (calcd.), g cm <sup>-3</sup>      | 1.546                                                              | 1.594                                                             |
| $\mu$ (Mo K $\alpha$ ), mm <sup>-1</sup> | 3.461                                                              | 3.368                                                             |
| $\theta$ max, deg.                       | 28.27                                                              | 28.28                                                             |
| no. of data                              | 3921                                                               | 3951                                                              |
| no. of parameters                        | 149                                                                | 203                                                               |
| <i>R</i> <sub>1</sub>                    | 0.0406                                                             | 0.0586                                                            |
| <i>wR</i> <sub>2</sub>                   | 0.1294                                                             | 0.1266                                                            |
| GOF                                      | 1.022                                                              | 1.006                                                             |

|                                          | [Tse <sup>Mes</sup> ]HgI·3MeOH                                                    | [Tse <sup>Mes</sup> ]CoI·3MeCN                                     |
|------------------------------------------|-----------------------------------------------------------------------------------|--------------------------------------------------------------------|
| lattice                                  | Rhombohedral                                                                      | Rhombohedral                                                       |
| formula                                  | C <sub>39</sub> H <sub>52</sub> BHgIN <sub>6</sub> O <sub>3</sub> Se <sub>3</sub> | C <sub>42</sub> H <sub>49</sub> BCoIN <sub>9</sub> Se <sub>3</sub> |
| formula weight                           | 1228.05                                                                           | 1113.42                                                            |
| space group                              | R-3                                                                               | R-3                                                                |
| <i>a</i> /Å                              | 14.823(1)                                                                         | 14.7744(8)                                                         |
| <i>b</i> /Å                              | 14.823(1)                                                                         | 14.7744(8)                                                         |
| <i>c</i> /Å                              | 37.136(5)                                                                         | 38.319(2)                                                          |
| $\alpha$ /°                              | 90.00                                                                             | 90.00                                                              |
| $\beta$ /°                               | 90.00                                                                             | 90.00                                                              |
| $\gamma$ /°                              | 120.00                                                                            | 120.00                                                             |
| <i>V</i> /Å <sup>3</sup>                 | 7066.1(12)                                                                        | 7243.7(7)                                                          |
| <i>Z</i>                                 | 6                                                                                 | 6                                                                  |
| temperature (K)                          | 243                                                                               | 243                                                                |
| radiation ( $\lambda$ , Å)               | 0.71073                                                                           | 0.71073                                                            |
| $\rho$ (calcd.), g cm <sup>-3</sup>      | 1.732                                                                             | 1.531                                                              |
| $\mu$ (Mo K $\alpha$ ), mm <sup>-1</sup> | 6.280                                                                             | 3.294                                                              |
| $\theta$ max, deg.                       | 28.24                                                                             | 28.23                                                              |
| no. of data                              | 3695                                                                              | 3783                                                               |
| no. of parameters                        | 168                                                                               | 179                                                                |
| <i>R</i> <sub>1</sub>                    | 0.0512                                                                            | 0.0307                                                             |
| <i>wR</i> <sub>2</sub>                   | 0.1315                                                                            | 0.0793                                                             |
| GOF                                      | 1.003                                                                             | 1.016                                                              |



|                                          | [Tse <sup>Mes</sup> ]ZnSPh                                          | [Tse <sup>Mes</sup> ] <sub>2</sub> Zn•5MeCN                                       |
|------------------------------------------|---------------------------------------------------------------------|-----------------------------------------------------------------------------------|
| lattice                                  | Triclinic                                                           | Monoclinic                                                                        |
| formula                                  | C <sub>42</sub> H <sub>45</sub> BN <sub>6</sub> SSe <sub>3</sub> Zn | C <sub>82</sub> H <sub>95</sub> B <sub>2</sub> N <sub>17</sub> Se <sub>6</sub> Zn |
| formula weight                           | 978.96                                                              | 1879.50                                                                           |
| space group                              | <i>P</i> -1                                                         | <i>C</i> 2/ <i>c</i>                                                              |
| <i>a</i> /Å                              | 9.3041(8)                                                           | 20.640(3)                                                                         |
| <i>b</i> /Å                              | 21.886(2)                                                           | 18.829(3)                                                                         |
| <i>c</i> /Å                              | 22.382(2)                                                           | 24.172(4)                                                                         |
| $\alpha$ /°                              | 73.753(2)                                                           | 90                                                                                |
| $\beta$ /°                               | 85.956(2)                                                           | 92.623(2)                                                                         |
| $\gamma$ /°                              | 89.978(2)                                                           | 90                                                                                |
| <i>V</i> /Å <sup>3</sup>                 | 4363.7(7)                                                           | 9384(2)                                                                           |
| <i>Z</i>                                 | 4                                                                   | 4                                                                                 |
| temperature (K)                          | 243                                                                 | 243                                                                               |
| radiation ( $\lambda$ , Å)               | 0.71073                                                             | 0.71073                                                                           |
| $\rho$ (calcd.), g cm <sup>-3</sup>      | 1.490                                                               | 1.330                                                                             |
| $\mu$ (Mo K $\alpha$ ), mm <sup>-1</sup> | 3.149                                                               | 2.673                                                                             |
| $\theta$ max, deg.                       | 26.02                                                               | 28.35                                                                             |
| no. of data                              | 17021                                                               | 10934                                                                             |
| no. of parameters                        | 973                                                                 | 423                                                                               |
| <i>R</i> <sub>1</sub>                    | 0.0791                                                              | 0.0521                                                                            |
| <i>wR</i> <sub>2</sub> <sup>a</sup>      | 0.1839                                                              | 0.0840                                                                            |
| GOF                                      | 1.109                                                               | 1.007                                                                             |

|                                         | $\{[\text{Tse}^{\text{Mes}}]_2\text{Ga}][\text{GaCl}_4] \cdot 2\text{MeCN}\}$        | $\{[\text{Tse}^{\text{Mes}}]_2\text{In}][\text{InCl}_4] \cdot 2\text{MeCN}\}$        |
|-----------------------------------------|--------------------------------------------------------------------------------------|--------------------------------------------------------------------------------------|
| lattice                                 | Monoclinic                                                                           | Monoclinic                                                                           |
| formula                                 | $\text{C}_{76}\text{H}_{86}\text{B}_2\text{Cl}_4\text{Ga}_2\text{N}_{14}\text{Se}_6$ | $\text{C}_{76}\text{H}_{86}\text{B}_2\text{Cl}_4\text{In}_2\text{N}_{14}\text{Se}_6$ |
| formula weight                          | 1972.21                                                                              | 2062.41                                                                              |
| space group                             | $P2_1/c$                                                                             | $P2_1/c$                                                                             |
| $a/\text{\AA}$                          | 16.366(1)                                                                            | 16.464(1)                                                                            |
| $b/\text{\AA}$                          | 22.280(2)                                                                            | 22.369(1)                                                                            |
| $c/\text{\AA}$                          | 24.541(2)                                                                            | 24.862(2)                                                                            |
| $\alpha/^\circ$                         | 90                                                                                   | 90                                                                                   |
| $\beta/^\circ$                          | 109.217(1)                                                                           | 108.965(1)                                                                           |
| $\gamma/^\circ$                         | 90                                                                                   | 90                                                                                   |
| $V/\text{\AA}^3$                        | 8450(1)                                                                              | 8658.9(9)                                                                            |
| $Z$                                     | 4                                                                                    | 4                                                                                    |
| temperature (K)                         | 243                                                                                  | 243                                                                                  |
| radiation ( $\lambda$ , $\text{\AA}$ )  | 0.71073                                                                              | 0.71073                                                                              |
| $\rho$ (calcd.), $\text{g cm}^{-3}$     | 1.550                                                                                | 1.582                                                                                |
| $\mu$ (Mo $K\alpha$ ), $\text{mm}^{-1}$ | 3.398                                                                                | 3.227                                                                                |
| $\theta$ max, deg.                      | 28.33                                                                                | 28.32                                                                                |
| no. of data                             | 19616                                                                                | 19970                                                                                |
| no. of parameters                       | 976                                                                                  | 976                                                                                  |
| $R_1$                                   | 0.0556                                                                               | 0.0425                                                                               |
| $wR_2$                                  | 0.1222                                                                               | 0.0528                                                                               |
| GOF                                     | 1.006                                                                                | 1.016                                                                                |

|                                          | $\{[\text{Tse}^{\text{Mes}}]\text{Cu}\}_2 \cdot 6\text{MeCN}$             | $\{[\text{Tm}^{\text{Mes}}]\text{Cu}\}_2 \cdot 6\text{MeCN}$             |
|------------------------------------------|---------------------------------------------------------------------------|--------------------------------------------------------------------------|
| lattice                                  | Triclinic                                                                 | Triclinic                                                                |
| formula                                  | $\text{C}_{84}\text{H}_{98}\text{B}_2\text{Cu}_2\text{N}_{18}\text{Se}_6$ | $\text{C}_{84}\text{H}_{98}\text{B}_2\text{Cu}_2\text{N}_{18}\text{S}_6$ |
| formula weight                           | 1982.26                                                                   | 1700.86                                                                  |
| space group                              | <i>P</i> -1                                                               | <i>P</i> -1                                                              |
| <i>a</i> /Å                              | 13.111(3)                                                                 | 12.835(2)                                                                |
| <i>b</i> /Å                              | 13.614(3)                                                                 | 13.514(2)                                                                |
| <i>c</i> /Å                              | 15.098(3)                                                                 | 15.052(2)                                                                |
| $\alpha$ /°                              | 69.291(4)                                                                 | 70.472(4)                                                                |
| $\beta$ /°                               | 81.177(3)                                                                 | 83.347(3)                                                                |
| $\gamma$ /°                              | 63.195(4)                                                                 | 64.730(3)                                                                |
| <i>V</i> /Å <sup>3</sup>                 | 2249.9(9)                                                                 | 2224.1(6)                                                                |
| <i>Z</i>                                 | 1                                                                         | 1                                                                        |
| temperature (K)                          | 243                                                                       | 243                                                                      |
| radiation ( $\lambda$ , Å)               | 0.71073                                                                   | 0.71073                                                                  |
| $\rho$ (calcd.), g cm <sup>-3</sup>      | 1.463                                                                     | 1.270                                                                    |
| $\mu$ (Mo K $\alpha$ ), mm <sup>-1</sup> | 2.952                                                                     | 0.672                                                                    |
| $\theta$ max, deg.                       | 23.26                                                                     | 25.00                                                                    |
| no. of data                              | 5974                                                                      | 7417                                                                     |
| no. of parameters                        | 512                                                                       | 506                                                                      |
| $R_1$                                    | 0.0508                                                                    | 0.0683                                                                   |
| $wR_2^a$                                 | 0.1098                                                                    | 0.1740                                                                   |
| GOF                                      | 1.245                                                                     | 1.083                                                                    |

|                                          | [Tse <sup>Mes</sup> ]Re(CO) <sub>3</sub> ·5C <sub>6</sub> H <sub>6</sub>         | [Tm <sup>Mes</sup> ]Re(CO) <sub>3</sub> ·4C <sub>6</sub> H <sub>6</sub>         |
|------------------------------------------|----------------------------------------------------------------------------------|---------------------------------------------------------------------------------|
| lattice                                  | Monoclinic                                                                       | Monoclinic                                                                      |
| formula                                  | C <sub>69</sub> H <sub>70</sub> BN <sub>6</sub> O <sub>3</sub> ReSe <sub>3</sub> | C <sub>63</sub> H <sub>64</sub> BN <sub>6</sub> O <sub>3</sub> ReS <sub>3</sub> |
| formula weight                           | 1465.20                                                                          | 1246.39                                                                         |
| space group                              | <i>P2<sub>1</sub>/c</i>                                                          | <i>P2<sub>1</sub>/n</i>                                                         |
| <i>a</i> /Å                              | 10.3336(7)                                                                       | 10.1948(9)                                                                      |
| <i>b</i> /Å                              | 21.623(2)                                                                        | 21.590(2)                                                                       |
| <i>c</i> /Å                              | 30.390(2)                                                                        | 27.969(2)                                                                       |
| $\alpha$ /°                              | 90                                                                               | 90                                                                              |
| $\beta$ /°                               | 92.894(2)                                                                        | 96.845(2)                                                                       |
| $\gamma$ /°                              | 90                                                                               | 90                                                                              |
| <i>V</i> /Å <sup>3</sup>                 | 6781.7(9)                                                                        | 6112.2(9)                                                                       |
| <i>Z</i>                                 | 4                                                                                | 4                                                                               |
| temperature (K)                          | 243                                                                              | 243                                                                             |
| radiation ( $\lambda$ , Å)               | 0.71073                                                                          | 0.71073                                                                         |
| $\rho$ (calcd.), g cm <sup>-3</sup>      | 1.435                                                                            | 1.354                                                                           |
| $\mu$ (Mo K $\alpha$ ), mm <sup>-1</sup> | 3.450                                                                            | 2.139                                                                           |
| $\theta$ max, deg.                       | 28.30                                                                            | 28.32                                                                           |
| no. of data                              | 15488                                                                            | 14302                                                                           |
| no. of parameters                        | 753                                                                              | 687                                                                             |
| <i>R</i> <sub>1</sub>                    | 0.0500                                                                           | 0.0705                                                                          |
| <i>wR</i> <sub>2</sub>                   | 0.1164                                                                           | 0.1183                                                                          |
| GOF                                      | 1.027                                                                            | 1.009                                                                           |
